# Supplementary material for: Reactomes of Porcine Alveolar Macrophages Infected with Porcine Reproductive and Respiratory Syndrome Virus
Source: PLoS One. 2013 Mar 19;8(3):e59229. doi: 10.1371/journal.pone.0059229 (PMC3602036; doi:10.1371/journal.pone.0059229)
Supplement: Table S1 — PRRSV tags, row counts and TPM detected. (XLSX) [file pone.0059229.s001.xlsx]

## Sheet: Supplemental Table 1
Tag	0h (mock infection)		6h		12h		16h		24h
	Count	TPM	Count	TPM	Count	TPM	Count	TPM	Count	TPM
Sense Strand
CGGCCGAAAT	0	0	225	2326.71	9500	92107.8	6902	51291.6	3632	18517.3
ATGGGCTGGC	0	0	10	103.41	470	4556.91	248	1842.99	24	122.36
ACTTTCGCGC	0	0	5	51.7	167	1619.16	83	616.81	2	10.2
ATAGCACGGC	0	0	4	41.36	82	795.04	13	96.61	3	15.3
TCCTGGCGCT	0	0	1	10.34	65	630.21	19	141.2	0	0
TTGGAGAAAT	0	0	4	41.36	79	765.95	14	104.04	0	0
AGGTGGGCAA	0	0	0	0	41	397.52	5	37.16	0	0
ACACCTGAGA	0	0	0	0	4	38.78	0	0	0	0
TGCGGTTGCT	0	0	0	0	3	29.09	0	0	0	0
TCAAGGAGTT	0	0	0	0	8	77.56	2	14.86	1	5.1
CTTTCTTCTT	0	0	0	0	14	135.74	0	0	0	0
TTTCAGTTCG	0	0	0	0	32	310.26	2	14.86	0	0
ACAACATTTC	0	0	0	0	12	116.35	1	7.43	0	0
ACGGGCAGAA	0	0	0	0	1	9.7	1	7.43	0	0
ACGAGCTAGG	0	0	0	0	21	203.61	0	0	0	0
CAAAGCCTTT	0	0	0	0	18	174.52	0	0	0	0
GTGAAATGCC	0	0	2	20.68	6	58.17	2	14.86	1	5.1
GGCCCCGCCC	0	0	1	10.34	17	164.82	1	7.43	0	0
TCACCTCCAG	0	0	0	0	6	58.17	2	14.86	0	0
GTCAACACAA	0	0	0	0	3	29.09	0	0	0	0
CCTCAAACTC	0	0	0	0	1	9.7	2	14.86	0	0
ATTAGGGCTT	0	0	1	10.34	0	0	0	0	0	0
GTCGCTGTCG	0	0	0	0	2	19.39	1	7.43	0	0
TGGAGCAGGG	0	0	1	10.34	4	38.78	2	14.86	0	0
TGGGAAAAAC	0	0	0	0	2	19.39	0	0	0	0
GACAGCTGTG	0	0	0	0	1	9.7	0	0	0	0
AAGGCGAGTA	0	0	0	0	1	9.7	0	0	0	0
CCAAACTATC	0	0	0	0	0	0	1	7.43	0	0
GCCTTCTGTT	0	0	0	0	1	9.7	0	0	0	0
ACTTACTGGT	0	0	0	0	0	0	0	0	1	5.1
TAGGTAAGTG	0	0	0	0	1	9.7	3	22.29	0	0
CCCCCCGGGT	0	0	0	0	1	9.7	1	7.43	0	0
AGGAATGCAG	0	0	0	0	1	9.7	0	0	0	0
GTCTGCGCAA	0	0	0	0	2	19.39	2	14.86	0	0
CCTGGACGCC	0	0	0	0	0	0	1	7.43	0	0
TGGCGATTCC	0	0	0	0	0	0	1	7.43	0	0
GTGTTGTTGG	0	0	0	0	2	19.39	0	0	0	0
GCTCATAGGT	0	0	0	0	1	9.7	0	0	0	0
CTGACTTGGC	0	0	1	10.34	5	48.48	4	29.73	0	0
AAGCTGAGGA	0	0	0	0	1	9.7	0	0	0	0
ATGGCCTGGG	0	0	0	0	2	19.39	2	14.86	0	0
CCAACCGAGC	0	0	0	0	4	38.78	1	7.43	0	0
GTGTCTCTGG	0	0	0	0	6	58.17	1	7.43	0	0
CTAACCAATT	0	0	0	0	1	9.7	0	0	0	0
TATGTGGCCG	0	0	0	0	1	9.7	2	14.86	0	0
TGAGTGATAA	0	0	0	0	3	29.09	1	7.43	0	0
Antisense Stand
GTTCTCGCCA	0	0	5	51.7	475	4605.39	241	1790.97	85	433.36
CTGAGGGTGA	0	0	2	20.68	130	1260.42	13	96.61	11	56.08
TACCCGAAGG	0	0	0	0	11	106.65	0	0	1	5.1
ACAGAAGTCA	0	0	0	0	7	67.87	1	7.43	0	0
CAATTCTTTG	0	0	0	0	9	87.26	0	0	1	5.1
GTCGACCACC	0	0	0	0	2	19.39	1	7.43	0	0
TTGGACGTAG	0	0	0	0	6	58.17	0	0	0	0
AGGAGATCAG	0	0	1	10.34	10	96.96	0	0	0	0
GTTTGCAGGC	0	0	0	0	6	58.17	0	0	1	5.1
ACGAGGCAAG	0	0	0	0	1	9.7	0	0	1	5.1
TTCGGCGCAG	0	0	0	0	2	19.39	1	7.43	0	0
GGCAGCCGGG	0	0	0	0	1	9.7	0	0	0	0
ATGCGGTACA	0	0	0	0	2	19.39	1	7.43	0	0
GACCCCATTT	0	0	0	0	0	0	0	0	3	15.3
CAGGGGTCCA	0	0	0	0	1	9.7	0	0	0	0
ATGTCAAAAA	0	0	0	0	1	9.7	0	0	0	0
AGTATTGCAG	0	0	0	0	0	0	0	0	1	5.1
TGATAGGCGA	0	0	0	0	2	19.39	0	0	0	0
GTGGGAGACT	0	0	2	20.68	0	0	4	29.73	0	0
TCCTCAAACT	0	0	0	0	1	9.7	0	0	0	0
GGGGTGACCA	0	0	0	0	0	0	1	7.43	0	0
AAGCCCTGGG	0	0	1	10.34	2	19.39	0	0	0	0
GGCAAACAGG	0	0	0	0	1	9.7	0	0	0	0
TTGGACGCAG	0	0	0	0	1	9.7	0	0	0	0
TGCGGCAGTT	0	0	0	0	1	9.7	0	0	0	0
GAGGACCCGA	0	0	0	0	1	9.7	0	0	0	0
GTGCGGCCAG	0	0	1	10.34	0	0	1	7.43	0	0
GCCAAGATTC	0	0	0	0	1	9.7	0	0	0	0
TGCAGAGCCA	0	0	0	0	0	0	0	0	1	5.1
TCCACTGTGT	0	0	0	0	1	9.7	0	0	0	0
ACCAATGTCA	0	0	0	0	2	19.39	0	0	1	5.1
TAGGGAATTG	0	0	0	0	1	9.7	0	0	0	0
